# Supplementary material for: Current practice and perceptions of safety protocols for the use of intraperitoneal chemotherapy in the operating room: results of the IP-OR international survey
Source: PubMed Central journal article supplement (PMC8223803; doi:10.1515/pp-2020-0148), 2021-02-12
Supplement: pp-06-20200148-s001.pdf [file pp-06-20200148-s001.pdf]

---

## **Survey on current practice and perceptions of safety protocols for the use of intraperitoneal chemotherapy**

---

This is a survey on safety measures and perceived safety among health professionals involved in the treatment of peritoneal cancer patients by HIPEC (*Hyperthermic intraperitoneal chemotherapy*) and PIPAC (*Pressurized intraperitoneal aerosol chemotherapy*). Aim of this study is not only to assess current practice but also to analyze feelings of safety/danger in all professional groups involved in order to confirm and optimize the present protocols.

*Your contribution is very much appreciated, thank you for your time!*

### **General Information**

#### **1) Gender**

- Female  Male

#### **2) Age**

- 18-25     26-35     36-45     46-55     >56

#### **3) Role**

- Surgeon
- Anesthesiologist
- Anesthesiology nurse
- Surgical technician / Scrub nurse / Operating room circulating nurse
- Operating room cleaning staff

#### **4) Professional experience on the manipulation, elimination and caution of chemotherapeutic agents (by direct or indirect contact)**

- < 1 year     < 3 years     < 5 years     > 5 years

## Availability of protective measures/devices

5) In your institution, to which extent are there protective measures/devices available for peritoneal cancer surgery (HIPEC / PIPAC)? Rate between 0 to 10. (0=insuffisant; 10= optimal)

1      2      3      4      5      6      7      8      9      10

6) Which of the protective measures below do you systematically use in your institution during peritoneal cancer surgery? Please encircle your answer for HIPEC and PIPAC for each item listed.

| Device                  | HIPEC |    |              | PIPAC |    |              |
|-------------------------|-------|----|--------------|-------|----|--------------|
|                         | Yes   | No | I don't know | Yes   | No | I don't know |
| Gloves                  | Yes   | No | I don't know | Yes   | No | I don't know |
| Double Gloves           | Yes   | No | I don't know | Yes   | No | I don't know |
| Long-sleeve gloves      | Yes   | No | I don't know | Yes   | No | I don't know |
| Protective eye shields  | Yes   | No | I don't know | Yes   | No | I don't know |
| Protective goggles      | Yes   | No | I don't know | Yes   | No | I don't know |
| Shoe covers             | Yes   | No | I don't know | Yes   | No | I don't know |
| FFP surgical mask       | Yes   | No | I don't know | Yes   | No | I don't know |
| Reinforced gown         | Yes   | No | I don't know | Yes   | No | I don't know |
| Plastic aprons          | Yes   | No | I don't know | Yes   | No | I don't know |
| Floor protective sheets | Yes   | No | I don't know | Yes   | No | I don't know |
| Laminar air flow        | Yes   | No | I don't know | Yes   | No | I don't know |
| Buffalo filter system   | Yes   | No | I don't know | Yes   | No | I don't know |

7) Can you explain why you don't use some or all of the above-mentioned devices? Please encircle your answer for both procedures whether HIPEC or PIPAC for each device listed.

**a) During HIPEC**

| Device                         | HIPEC         |            |          |                 |               |                 |
|--------------------------------|---------------|------------|----------|-----------------|---------------|-----------------|
| <i>Gloves</i>                  | Not available | Not useful | I forget | I'm not at risk | Uncomfortable | Not in protocol |
| <i>Double Gloves</i>           | Not available | Not useful | I forget | I'm not at risk | Uncomfortable | Not in protocol |
| <i>Long-sleeve gloves</i>      | Not available | Not useful | I forget | I'm not at risk | Uncomfortable | Not in protocol |
| <i>Protective eye shields</i>  | Not available | Not useful | I forget | I'm not at risk | Uncomfortable | Not in protocol |
| <i>Protective goggles</i>      | Not available | Not useful | I forget | I'm not at risk | Uncomfortable | Not in protocol |
| <i>Shoe covers</i>             | Not available | Not useful | I forget | I'm not at risk | Uncomfortable | Not in protocol |
| <i>FFP surgical mask</i>       | Not available | Not useful | I forget | I'm not at risk | Uncomfortable | Not in protocol |
| <i>Reinforced gown</i>         | Not available | Not useful | I forget | I'm not at risk | Uncomfortable | Not in protocol |
| <i>Plastic aprons</i>          | Not available | Not useful | I forget | I'm not at risk | Uncomfortable | Not in protocol |
| <i>Floor protective sheets</i> | Not available | Not useful | I forget | I'm not at risk | Uncomfortable | Not in protocol |
| <i>Laminar air flow</i>        | Not available | Not useful | I forget | I'm not at risk | Uncomfortable | Not in protocol |
| <i>Buffalo filter system</i>   | Not available | Not useful | I forget | I'm not at risk | Uncomfortable | Not in protocol |

**b) During PIPAC**

| Device                         | PIPAC         |            |          |                 |               |                 |
|--------------------------------|---------------|------------|----------|-----------------|---------------|-----------------|
| <i>Gloves</i>                  | Not available | Not useful | I forget | I'm not at risk | Uncomfortable | Not in protocol |
| <i>Double Gloves</i>           | Not available | Not useful | I forget | I'm not at risk | Uncomfortable | Not in protocol |
| <i>Long-sleeve gloves</i>      | Not available | Not useful | I forget | I'm not at risk | Uncomfortable | Not in protocol |
| <i>Protective eye shields</i>  | Not available | Not useful | I forget | I'm not at risk | Uncomfortable | Not in protocol |
| <i>Protective goggles</i>      | Not available | Not useful | I forget | I'm not at risk | Uncomfortable | Not in protocol |
| <i>Shoe covers</i>             | Not available | Not useful | I forget | I'm not at risk | Uncomfortable | Not in protocol |
| <i>FFP surgical mask</i>       | Not available | Not useful | I forget | I'm not at risk | Uncomfortable | Not in protocol |
| <i>Reinforced gown</i>         | Not available | Not useful | I forget | I'm not at risk | Uncomfortable | Not in protocol |
| <i>Plastic aprons</i>          | Not available | Not useful | I forget | I'm not at risk | Uncomfortable | Not in protocol |
| <i>Floor protective sheets</i> | Not available | Not useful | I forget | I'm not at risk | Uncomfortable | Not in protocol |
| <i>Laminar air flow</i>        | Not available | Not useful | I forget | I'm not at risk | Uncomfortable | Not in protocol |
| <i>Buffalo filter system</i>   | Not available | Not useful | I forget | I'm not at risk | Uncomfortable | Not in protocol |

**8) Do you have access to a safety monitoring system in your hospital (*CIRS – Critical Incident Reporting System*)?**

yes

no

I don't know

**9) Are you aware of any incidents which occurred during HIPEC or PIPAC?**

yes  no

a) How many occurred? \_\_\_\_\_

b) How many were reported? \_\_\_\_\_

**10) In case of exposure of a surgical team member by chemotherapeutic agents during peritoneal cancer surgery, do you have access to a dedicated emergency spillage kit in your institution?**

yes  no  I don't know

**Safety perception**

**11) What do you think being the main risk of hazard due to chemotherapeutic agents during HIPEC and PIPAC? Please cross the single most appropriate answer in each column.**

| Main risk of hazard                          | HIPEC | PIPAC |
|----------------------------------------------|-------|-------|
| <i>Aerosols droplets</i>                     |       |       |
| <i>Spilling or splashing of chemotherapy</i> |       |       |
| <i>Contamination of surfaces</i>             |       |       |
| <i>Manipulation of contaminated wastes</i>   |       |       |
| <i>None</i>                                  |       |       |

12) During HIPEC and PIPAC procedures, how do you rate the protection measures/devices available in your institution? Please cross the single most appropriate answer in each column.

| Amount of protective measure/devices required | HIPEC | PIPAC |
|-----------------------------------------------|-------|-------|
| <i>Adequate</i>                               |       |       |
| <i>Exaggerated</i>                            |       |       |
| <i>Incomplete</i>                             |       |       |
| <i>Inexistant</i>                             |       |       |

If you didn't answer "Adequate" above, please comment why:

For HIPEC:

.....  
 .....

For PIPAC:

.....  
 .....

13) How do you generally rate your risk of contamination due to chemotherapeutic agents during HIPEC and PIPAC? Rate between 0 to 10. (0=no risk; 10= high risk)

For HIPEC:

1    2    3    4    5    6    7    8    9    10

For PIPAC:

1    2    3    4    5    6    7    8    9    10

**14) How strong do you rate your personal protection level in regards to the manipulation (by direct or indirect contact) of chemotherapeutic agents during or after surgery. Rate between 0 to 10. (0=not at all protected; 10= completely protected)**

**During HIPEC:**

1      2      3      4      5      6      7      8      9      10

**During PIPAC:**

1      2      3      4      5      6      7      8      9      10

**Information / education**

**15) Have you received dedicated training on the protective measures/devices required during HIPEC?**

yes

no

**16) Have you received dedicated training on the protective measures/devices required during PIPAC?**

yes

no

**17)How do you rate your level of information on the risks of chemotherapy related hazards of the operating room staff during HIPEC procedures? Rate between 0 to 10. (0= no information; 10=fully informed)**

**For HIPEC:**

1      2      3      4      5      6      7      8      9      10

**For PIPAC:**

1      2      3      4      5      6      7      8      9      10

**Would you like to receive more information on the risks of chemotherapy related hazards of the operating room staff during HIPEC or PIPAC procedures?**

yes

no

**Comments / Suggestions:**

.....  
.....  
.....  
.....  
.....  
.....

**Thank you for participation!**



**Appendix 1: Illustration of the material / devices mentioned on Q6 + Q7a-b**

**a) Gloves**

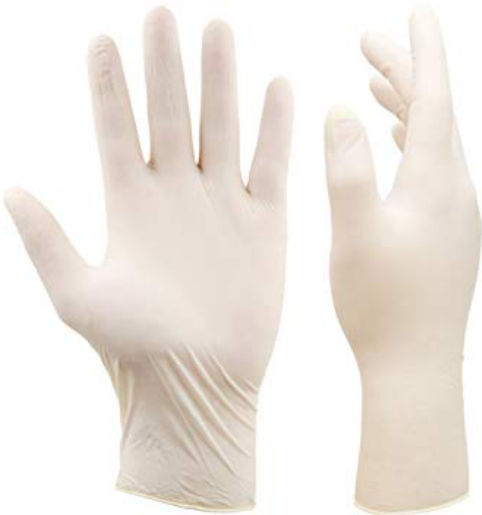

**b) Double Gloves refers to wearing two pairs of a)**

**c) Long-sleeve gloves**

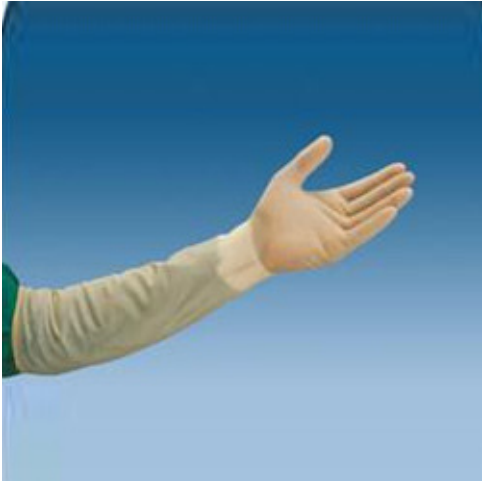

**d) Protective eye shields**

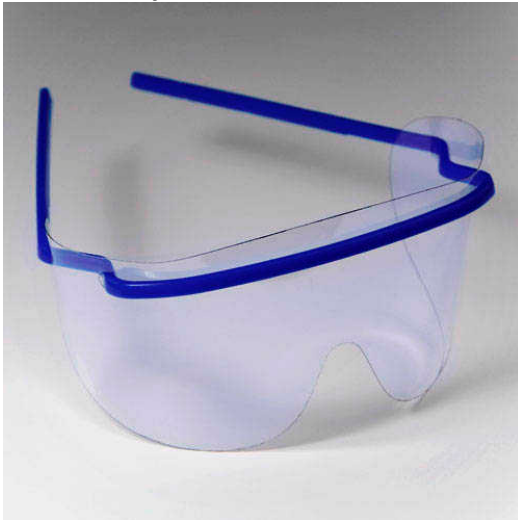

**e) Protective goggles**

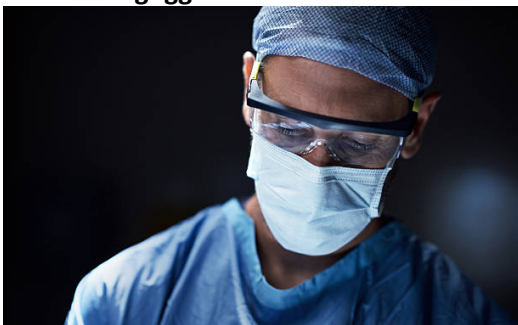

**f) Shoe covers**

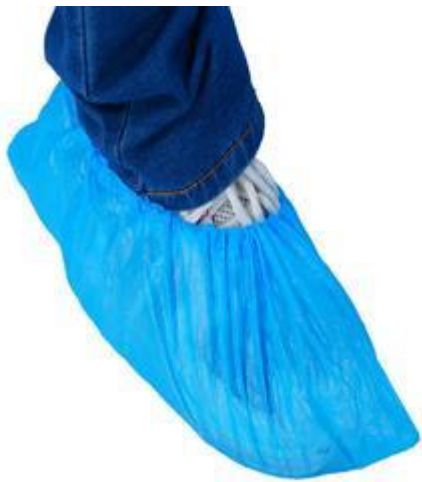

**g) FFP surgical mask**

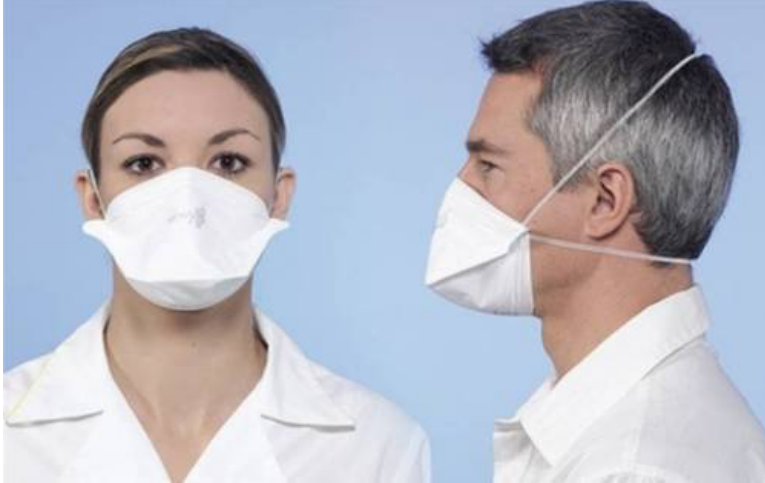

**FFP2**

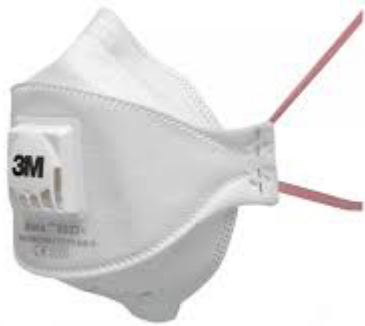

**FFP3**

**h) Reinforced gown**

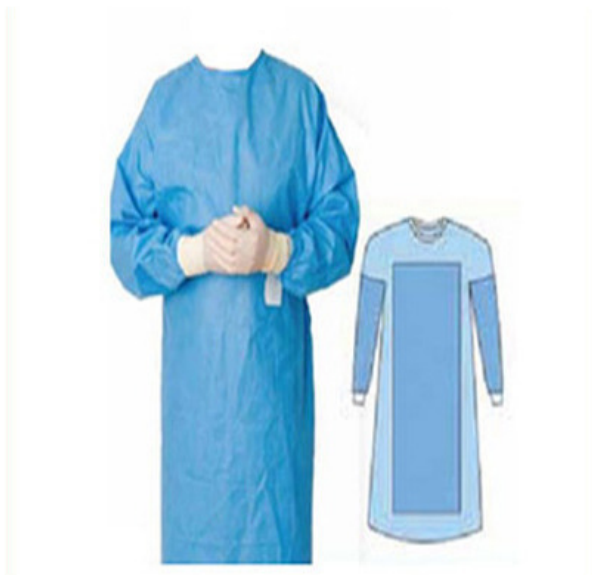

**i) Plastic aprons**

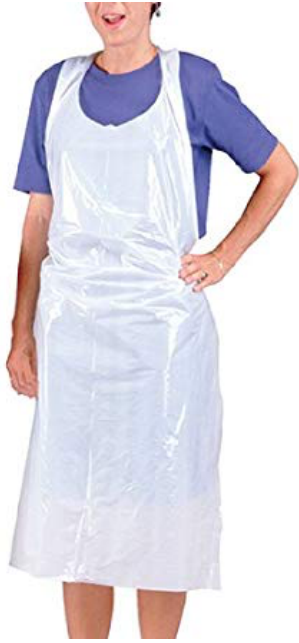

j) Floor protective sheets

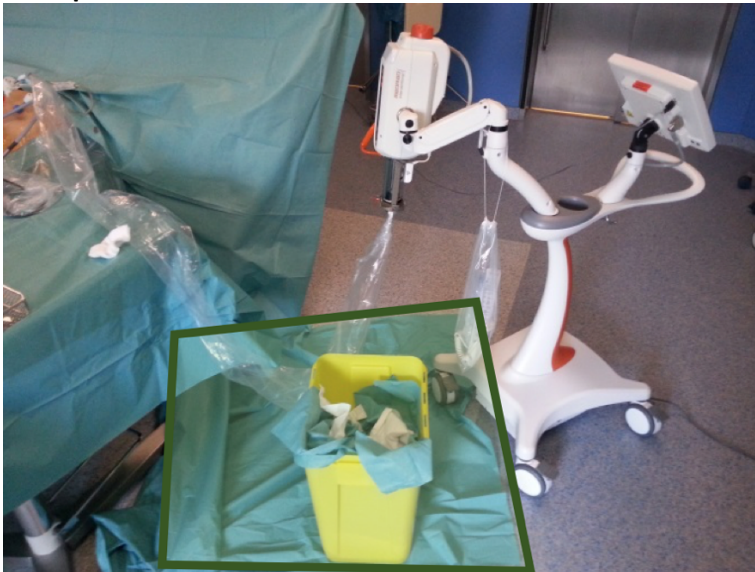

**k) Laminar air flow**

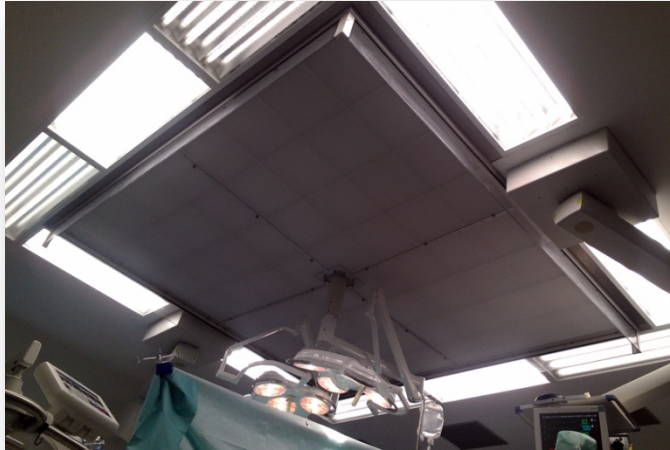

**l) Buffalo filter system or other surgical gas aspiration systems (ERBE, Covidien etc)**

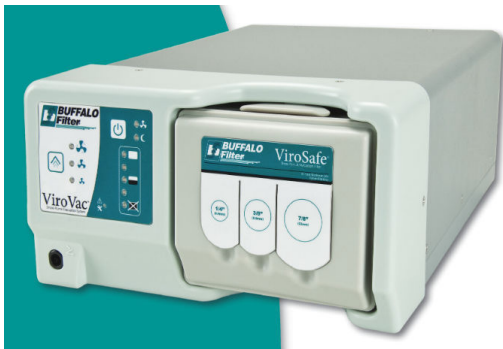

Buffalo

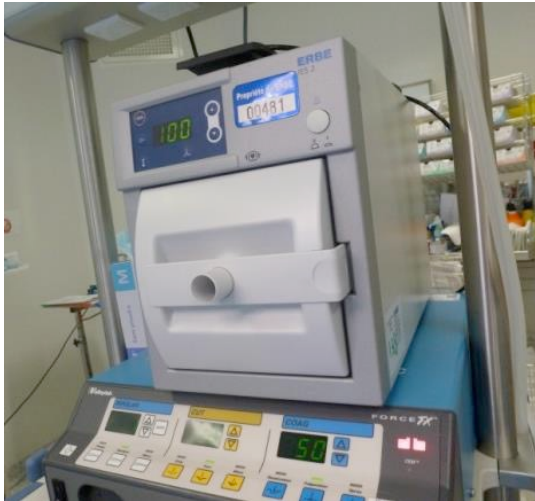

ERBE
